# Supplementary material for: Seeding-competent early tau multimers are associated with cell type-specific transcriptional signatures
Source: Springer Nature journal article supplement (doi:10.1007/s00401-025-02869-4), 2025-04-04
Supplement: MOESM1 [file 401_2025_2869_MOESM1_ESM.pdf]

# **Seeding-competent early tau multimers are associated with cell type-specific transcriptional signatures**

Simona Jogaudaite<sup>#1</sup>, Rahel Feleke<sup>#1</sup>, Elisavet Velentza-Almpani<sup>#1</sup>, Leung Yeung-Yeung<sup>1</sup>, Daniel Clode<sup>1</sup>, Jeong Hun Ko<sup>1</sup>, Maria Otero-Jimenez<sup>1</sup>, Ben Shin<sup>1</sup>, Steve Matthews<sup>1</sup>, Sarah J. Marzi<sup>1,2,3</sup>, Maxwell P. Spires-Jones<sup>4</sup>, Tara L. Spires-Jones<sup>4</sup>, Michael R. Johnson<sup>1</sup>, Javier Alegre-Abarrategui<sup>1</sup>

# These authors contributed equally to this work

1 Department of Brain Sciences, Imperial College London, Hammersmith Hospital, London, W12 0NN, UK

2 UK Dementia Research Institute at King's College London, London, SE5 9RT, UK

3 Department of Basic and Clinical Neuroscience, Institute of Psychiatry, Psychology and Neuroscience, King's College London, London, SE5 9RT, UK

4 The University of Edinburgh Centre for Discovery Brain Sciences and UK Dementia Research Institute, Edinburgh, EH8 9JZ, UK

Correspondence to:

Javier Alegre-Abarrategui

[j.alegre@imperial.ac.uk](mailto:j.alegre@imperial.ac.uk)

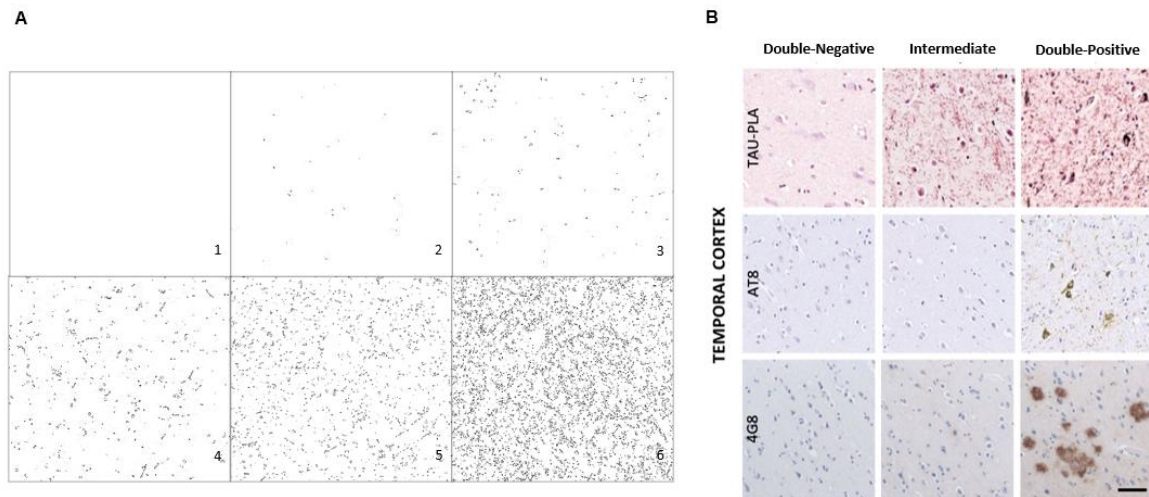

**Supplementary Fig. 1** **A** Semi-quantitative scale used for analysis. **B** Representative images of temporal cortex from Double-Negative, Intermediate, and Double-Positive groups stained with tau-PLA, AT8-IHC, and 4G8-IHC. Scale bar 50  $\mu$ m

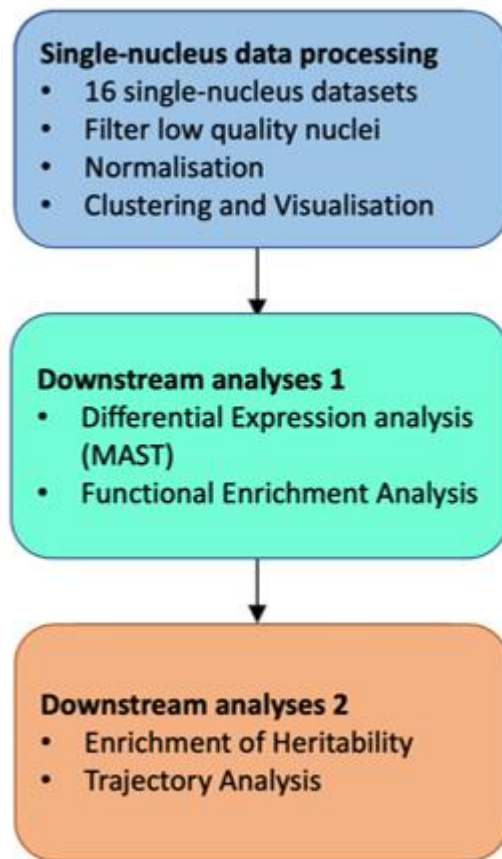

**Supplementary Fig. 2** Overview of pre-processing steps and downstream analysis carried out using 16 human brain tissue samples

### A AT8-IHC - Lesions

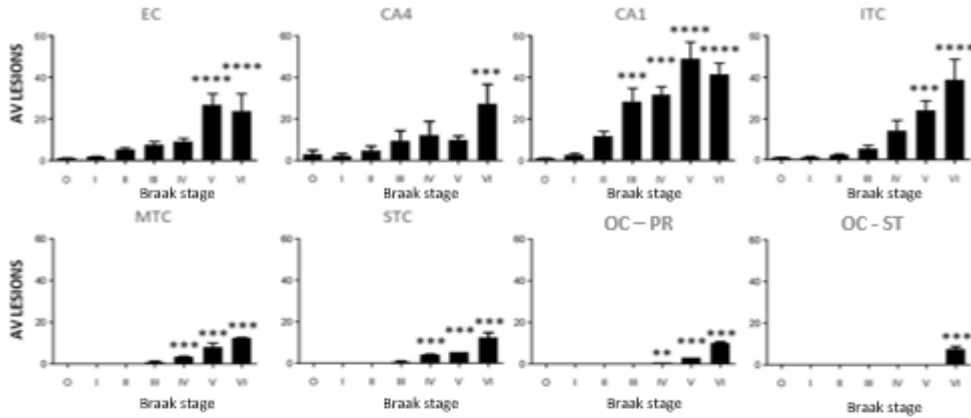

### B Tau-PLA – Diffuse pathology

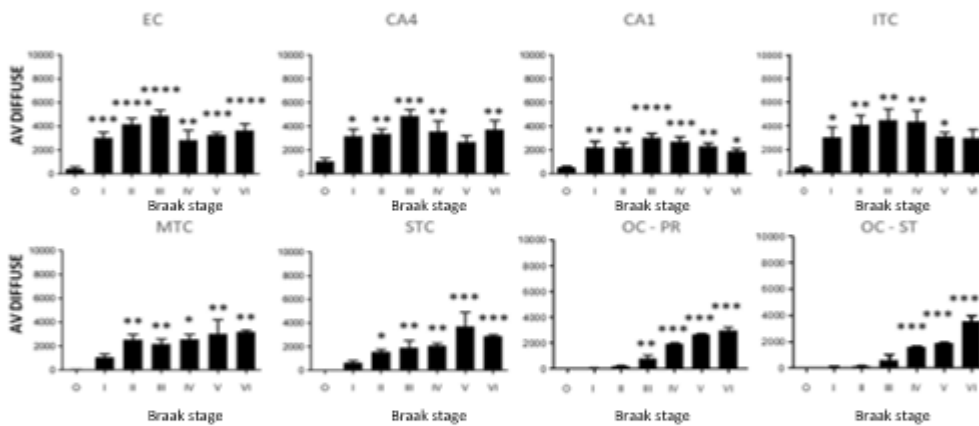

### C Tau-PLA – Lesions

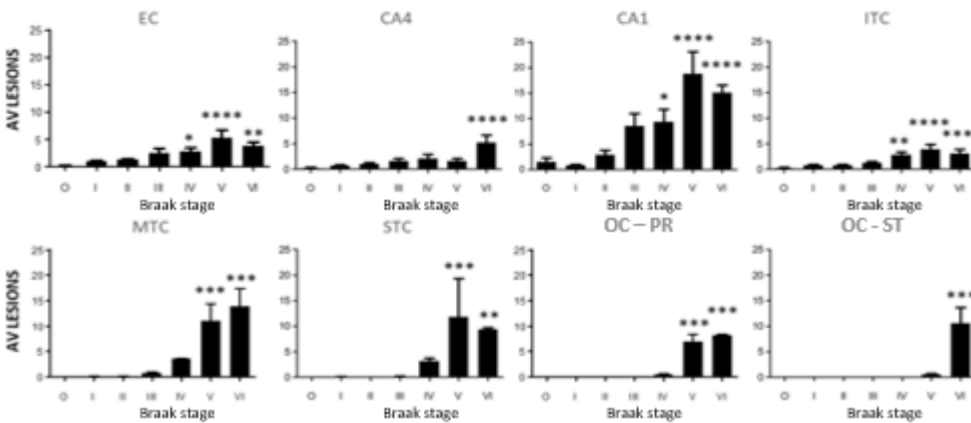

**Supplementary Fig. 3** Quantification of AT8-IHC labeled large perikaryal neurofibrillary-type lesions and tau-PLA labeled diffuse pathology and lesions in entorhinal, temporal and occipital cortices. Automated quantification of **A** AT8-IHC labeled large lesions, **B** tau-PLA diffuse pathology, and **C** tau-PLA labeled large lesions across the different brain areas. EC, CA4, CA1, OC, PR, and ST data in this figure were reproduced from the previous publication (doi 10.1186/s40478-020-01117-y). All groups were compared to the control (Braak 0) through a One-way ANOVA (Dunnett); N = 11/12/12/9/7/8/8. Each bar represents the mean  $\pm$

standard error of the mean (SEM). \* $p < 0.05$ , \*\* $p < 0.01$ , \*\*\* $p < 0.001$ , \*\*\*\* $p < 0.0001$ . Abbreviations: *EC*: Entorhinal cortex, *ITC*: Inferior temporal cortex, *MTC*: Middle temporal cortex, *STC*: Superior temporal cortex, *OC*: Occipital cortex, *PR*: Parastriate area, *ST*: Striate area, *AV*: average

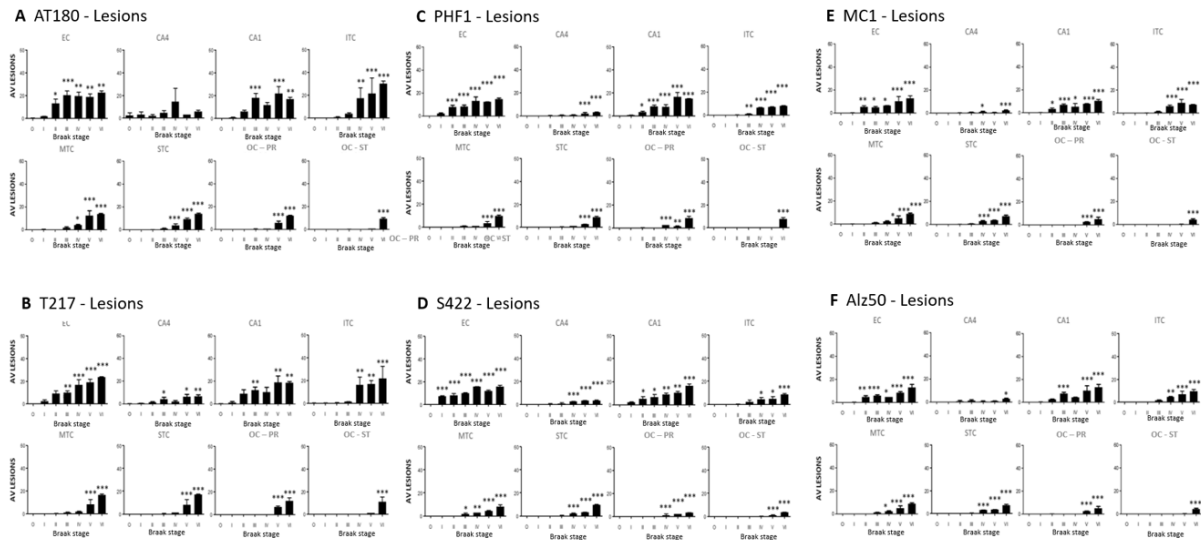

**Supplementary Fig. 4** Quantification of AT180-, T217-, PHF-1, S422-, MC1- and Alz50-IHC labeled large perikaryal neurofibrillary-type lesions in the hippocampus, temporal and occipital cortices. Automated quantification of **A** AT180-, **B** T217-, **C** PHF-1-, **D** S422-, **E** MC1-, and **F** Alz50-IHC labeled large lesions across the different brain areas. All groups were compared to the control (Braak 0) through a One-way (Dunnett);  $N = 11/12/12/9/7/8/8$ . Each bar represents the mean  $\pm$  standard error of the mean (SEM). \* $p < 0.05$ , \*\* $p < 0.01$ , \*\*\* $p < 0.001$ , \*\*\*\* $p < 0.0001$ . Abbreviations: *EC*: Entorhinal cortex, *ITC*: Inferior temporal cortex, *MTC*: Middle temporal cortex, *STC*: Superior temporal cortex, *OC*: Occipital cortex, *PR*: Parastriate area, *ST*: Striate area, *AV*: average

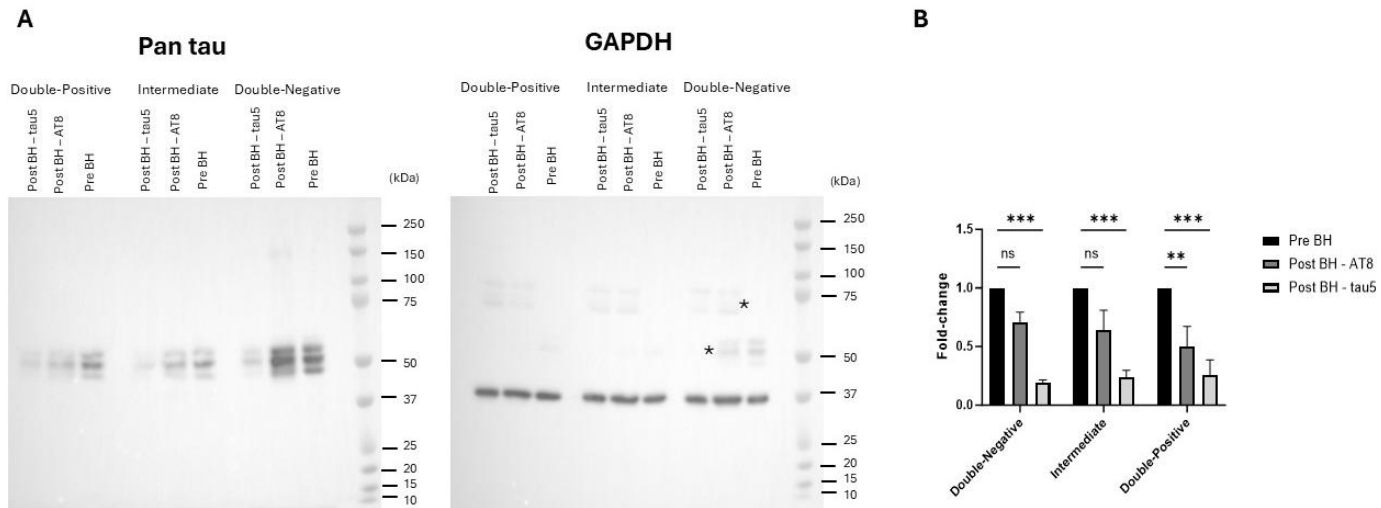

**Supplementary Fig. 5 Western blot analysis of immunodepleted brain homogenates.** **A** Detection of pan tau in non-immunodepleted (pre BH) and immunodepleted brain homogenates with AT8 antibody (post BH – AT8) and tau5 antibody (post BH – tau5) across Double-Negative, Intermediate, and Double-Positive groups. The blot was stripped and reprobed with GAPDH as a loading control to ensure equal protein loading across all samples. Asterisks (\*) indicate bands corresponding to the immunoglobulins used for immunodepletion, detected due to being the same species as the anti-GAPDH antibody, and residual tau bands due to incomplete stripping. Molecular weight markers (kDa) are indicated on the right. **B** Representative fold changes in densitometry for pan tau protein levels using Western blot analysis. Each column represents a normalized ratio (fold-changes) to GAPDH and to control (non-immunodepleted brain homogenate, pre BH). One sample from each group was run in duplicates. Data was evaluated using Two-way ANOVA comparing to the control (pre BH) followed by Dunnett's Multiple Comparison Test. Each bar represents the mean  $\pm$  standard error of the mean (SEM).

\* $p < 0.05$ , \*\* $p < 0.01$ , \*\*\* $p < 0.001$

## A Investigation of the seeding activity of self-interacting tau molecules

### Real-time quaking-induced conversion - RT-QuIC for AD & Healthy Control cases

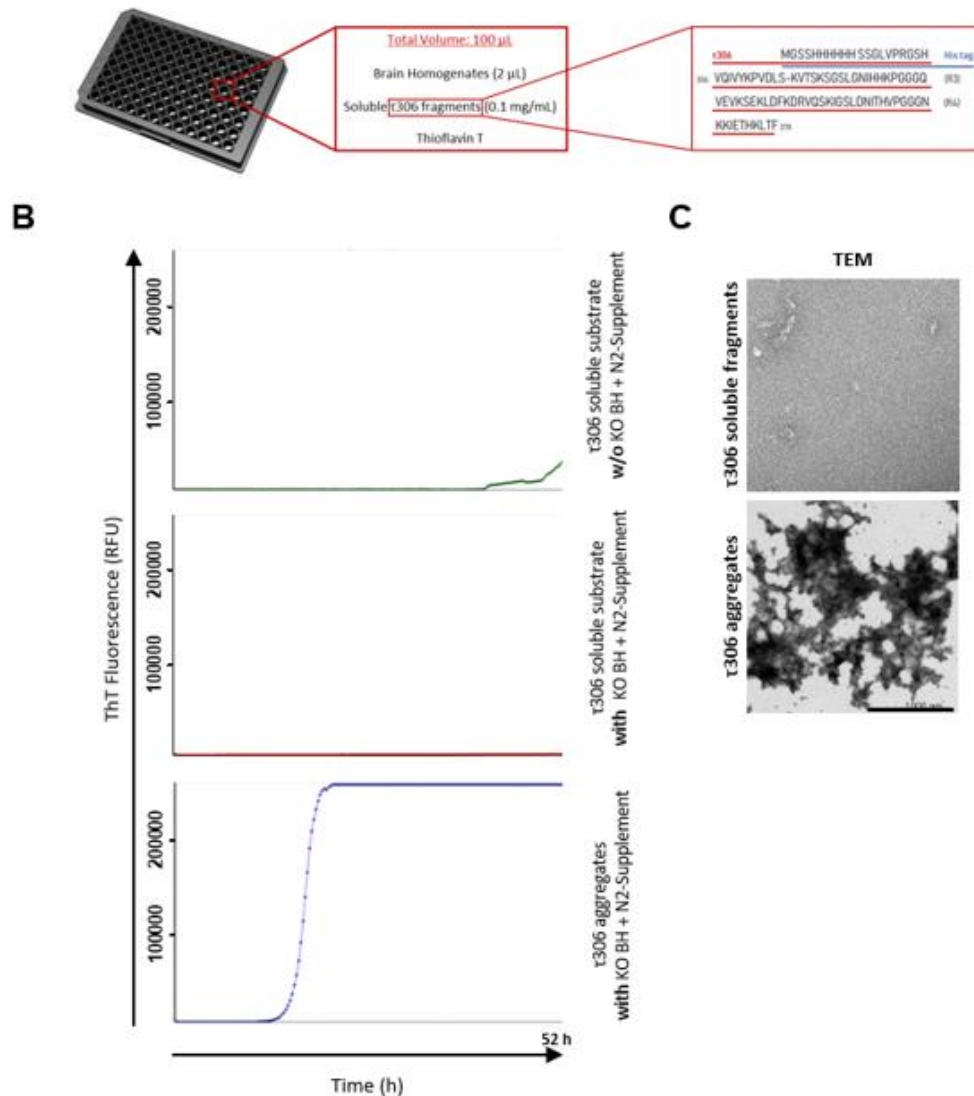

**Supplementary Fig. 6** ThT fluorescence data of RT-QuIC analysis. **A** Schematic representation of RT-QuIC reaction and  $\tau$ 306 tau plasmid construct, consisting of residues 306–378 of full-length human tau isoform httau40 with a point mutation at residue 322 cysteine to serine. **B** RT-QuIC analysis of  $\tau$ 306 soluble fragments and  $\tau$ 306 aggregates under different conditions. Each curve represents a single case, run in triplicate for each dilution. **C** Transmission electron microscopy of recombinant  $\tau$ 306 soluble monomers and  $\tau$ 306 aggregated species. Aggregation of recombinant  $\tau$ 306 fragment was induced by shaking in the presence of heparin. Scale bar 1000 nm. Abbreviations: *TEM*: Transmission electron microscopy

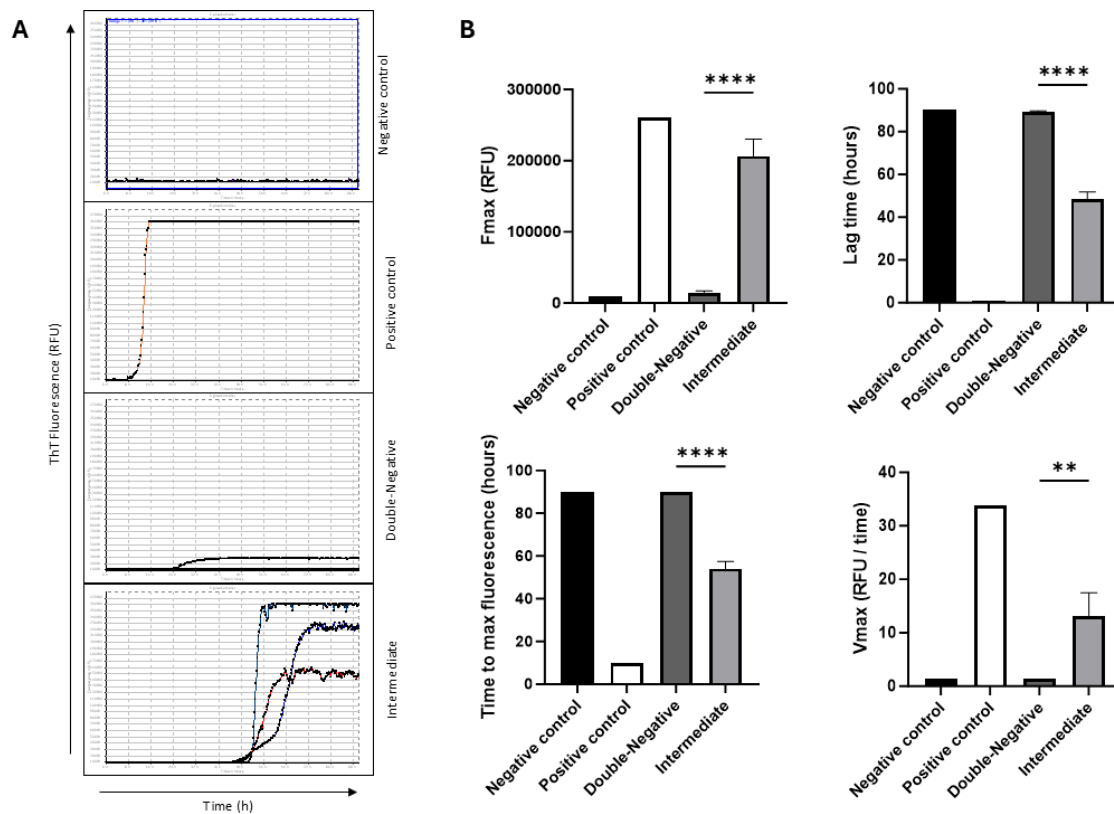

**Supplementary Fig. 7** Tau RT-QuIC analysis using CSF samples. **A** RT-QuIC analysis of negative control (tau MAPT KO mouse brain homogenate), positive control ( $\tau$ 306 aggregates), Double-Negative and Intermediate CSF. Each curve represents a single case, run in triplicate. **B** Comparison of tau seeding activity of negative control (tau MAPT KO mouse brain homogenate), positive control ( $\tau$ 306 aggregates), Double-Negative, and Intermediate CSF with RT-QuIC. Fmax (maximum ThT fluorescence), lag time (reaction time to exceed a ThT fluorescence threshold of the average baseline fluorescence + 5 SD), time to reach maximum ThT fluorescence, and Vmax (maximum slope) were analyzed. The assay cut-off was determined to be 90 h as a reproducible endpoint before the spontaneous amyloid aggregation in the negative control wells. Groups were assessed through unpaired t test; N = 3/3. Each bar represents the mean  $\pm$  standard error of the mean (SEM). \* $p < 0.05$ , \*\* $p < 0.01$ , \*\*\* $p < 0.001$ , \*\*\*\* $p < 0.0001$



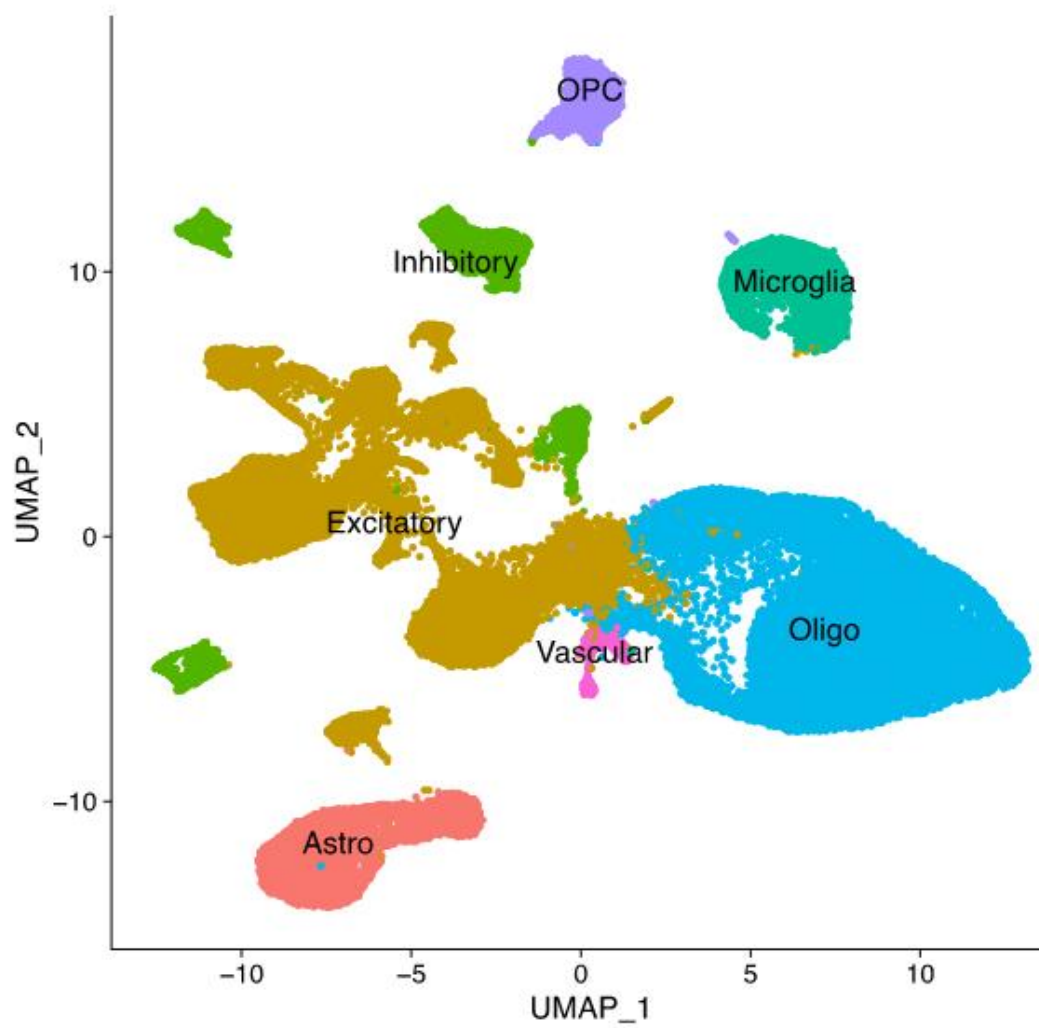

**Supplementary Fig. 8** A Uniform Manifold Approximation and Projection (UMAP) plot illustrating nuclei derived from all subjects, with a joint plot created by amalgamating around 52,000 nuclei. Abbreviations: *Oligo*: Oligodendrocytes, *OPC*: Oligodendrocyte Progenitor Cells, *Astro*: Astrocytes

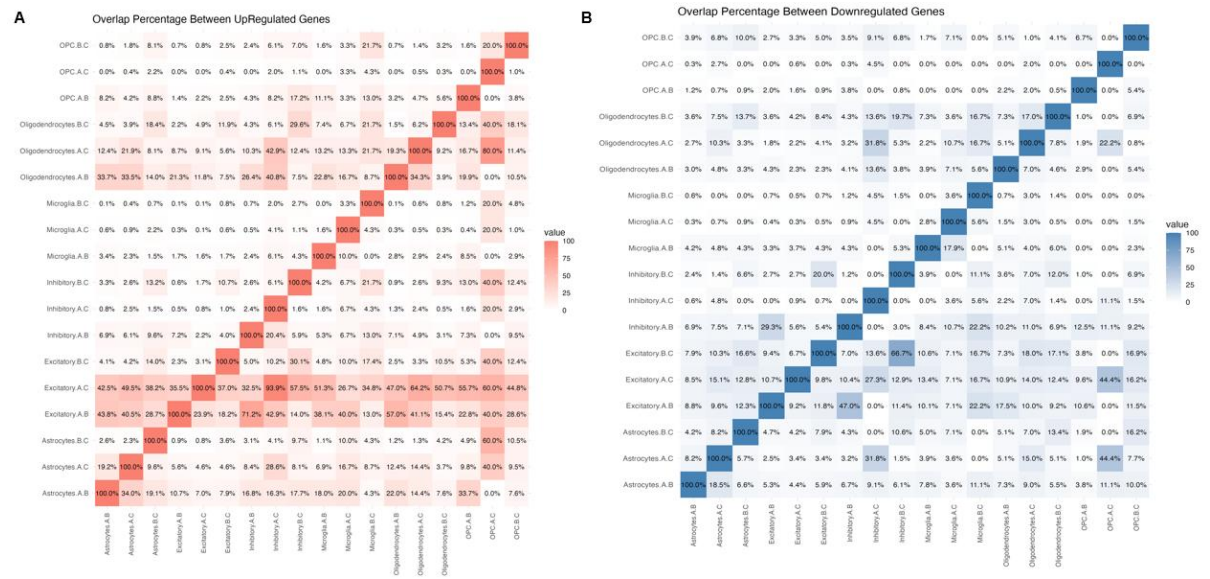

**Supplementary Fig. 9** Percentages of overlapping DEGs across all comparisons. **A** Red colored squares for up-regulated genes. **B** Blue colored for down-regulated genes. *Abbreviations:* A: Double-Negative; B: Intermediate; C: Double-Positive

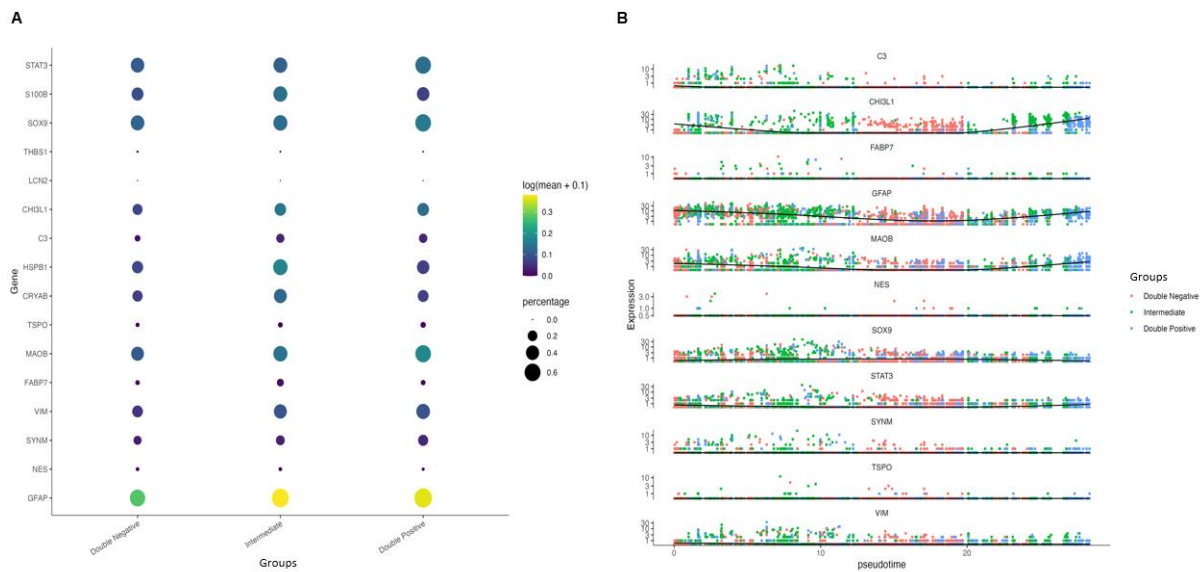

**Supplementary Fig. 10** Expression levels of reactive astrocyte marker genes across the groups. **A** Log mean expression values of marker genes in each group. **B** Pseudotime plot of marker genes along a trajectory (from Double-Negative to Double-Positive)

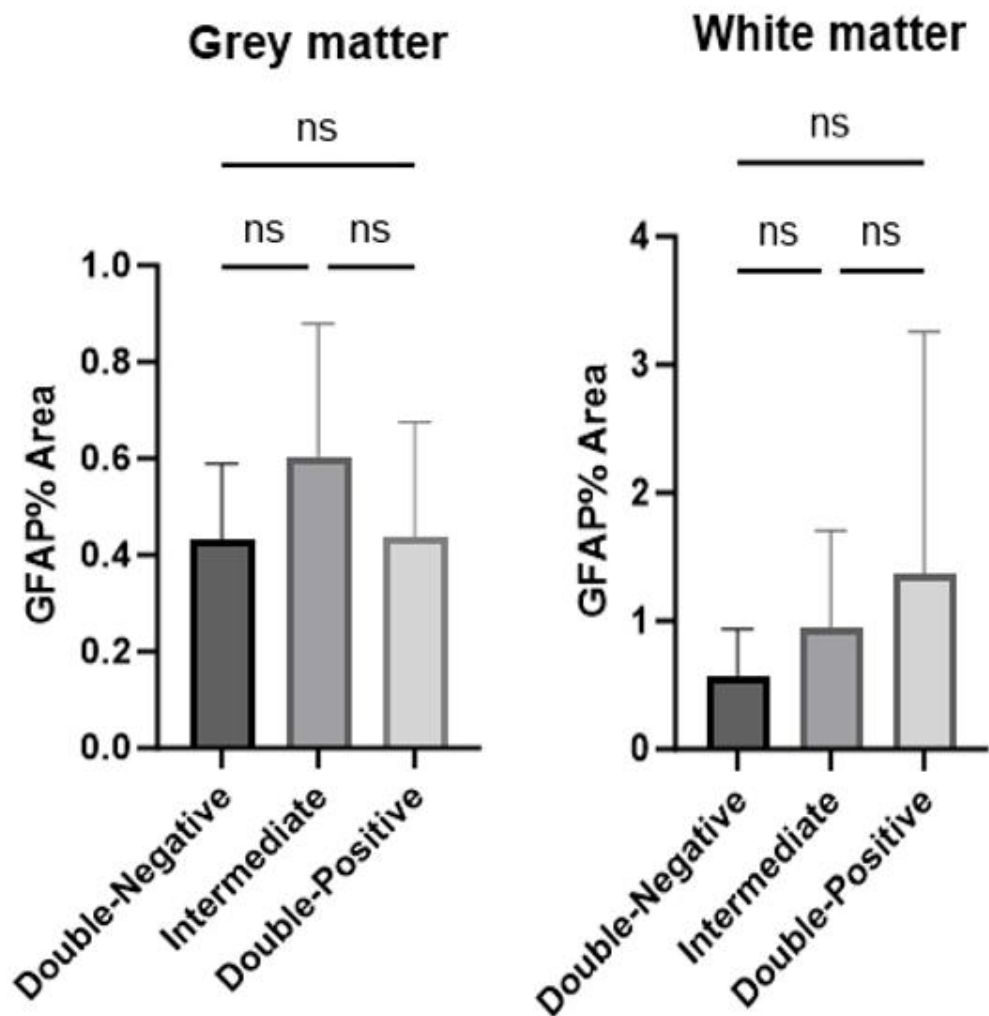

**Supplementary Fig. 11** Immunohistochemical staining of GFAP in the temporal cortex. The percentage of GFAP-positive stained area was assessed in both the white and grey matter regions of the temporal cortex across three distinct groups: Double-Negative, Intermediate, and Double-Positive. Groups were assessed through a One-way ANOVA (Bonferroni);  $N = 6/5/5$ . Each bar represents the mean  $\pm$  standard error of the mean (SEM).
